# Supplementary material for: Senescence atlas reveals an aged-like inflamed niche that blunts muscle regeneration
Source: PubMed Central journal article supplement (PMC9812788; doi:10.1038/s41586-022-05535-x), 2022-12-21
Supplement: 41586_2022_5535_MOESM1_ESM.pdf [file 41586_2022_5535_MOESM1_ESM.pdf]

---

**Supplementary information**

---

**Senescence atlas reveals an aged-like  
inflamed niche that blunts muscle  
regeneration**

---

In the format provided by the  
authors and unedited

| Antibody                       | Brand               | Reference    | Dilution     |
|--------------------------------|---------------------|--------------|--------------|
| nGFP                           | Invitrogen          | #A6455       | 1/400        |
| eMHC                           | DSHB                | #F1.652      | Ready to use |
| p16 <sup>INKA4</sup>           | Invitrogen          | #MA5-17142   | 1/100        |
| TCF4                           | Cell Signaling      | #2569S       | 1/80         |
| CD11b                          | eBioscience         | #14-0112-85  | 1/100        |
| Lamin B1                       | Abcam               | #ab16048-100 | 1/100        |
| CD36                           | Invitrogen          | #MA5-14112   | 1/100        |
| $\gamma$ H2AX                  | Cell Signaling      | #2577S       | 1/50         |
| Pax7                           | Abcam               | #ab34360     | 1/100        |
| Pax7                           | Santa Cruz          | #sc-81648    | 1/20         |
| Ki67                           | Abcam               | #ab15580     | 1/100        |
| PDGF Receptor alpha (D1E1E) XP | Cell signaling      | #3174        | 1/200        |
| F4/80                          | Abcam               | #ab6640      | 1/200        |
| PDGF Receptor alpha            | Mybiosource/Bionova | #MBS9700557  | 1/100        |
| p16 <sup>INK4a</sup> (1E12E10) | Fisher Scientific   | #MA5-17142   | 1/100        |
| Human PDGFR alpha              | R&D Systems         | #AF-307-NA   | 1/100        |
| Human 53BP1                    | Abcm                | #ab21083     | 1/100        |
| Human Pax7                     | Santa Cruz          | #sc-81648    | 1/50         |
| Human CD68                     | DAKO                | #M0718       | 1/50         |

**Table 1.** Antibodies used in this study.

| Gene                | Forward primer             | Reverse primer             |
|---------------------|----------------------------|----------------------------|
| p16 <sup>INKA</sup> | CATCTGGAGCAGCATGGAGTC      | ATCATCATCACCTGAATCGGGG     |
| mRFP                | GACCTCGGCGTCGTAGTG         | AAGGGCGAGATCAAGATGAG       |
| p19 <sup>ARF</sup>  | TGAGGCTAGAGAGGATCTTGAGA    | GCAGAAGAGCTGCTACGTGAA      |
| p21                 | CCAGGCCAAGATGGTGTCTT       | TGAGAAAGGATCAGCCATTGC      |
| Il-6                | GGTGACAACCACGGCCTTCCC      | AAGCCTCCGACTTGTGAAGTGGT    |
| Il-1b               | CCAAAATACCTGTGGCCTTGG      | GCTTGTGCTCTGCTTGTGAG       |
| PAI-1               | CCGATGGGCTCGAGTATGA        | TTGTCTGATGAGTTCAGCATCCA    |
| TNF $\alpha$        | CGCTCTTCTGTCTACTGAACTT     | GATGAGAGGGAGGCCATT         |
| IFN $\gamma$        | AGCGGCTGACTGAACTCAGATTGTAG | GTCACAGTTTTT CAGCTGTATAGGG |
| Il-12               | TCCAGCGCAAGAAAGAAAA        | AATAGCGATCCTGAGCTTGC       |
| Ccl12               | CCCACTCACCTGCTGCTACT       | TCTGGACCCATTCTTCTTG        |
| Il-18               | CTGGCTGTGACCCTCTCTGT       | ATCTTCCTTTTGGCAAGCAA       |
| Rpl7                | GAAGCTCATCTATGAGAAGGC      | AAGACGAAGGAGCTGCAGAAC      |
| Ccl2                | CACTCACCTGCTGCTACTCA       | GAGCTTGGTGACAAAACTACAGC    |
| Ccl7                | GTCCCCGGGAAGCTGTAATC       | GCTTTGGAGTTTGGGTTTTCTT     |
| Ccl8                | ACGCTAGCCTTCACTCCAAA       | GTGACTGGAGCCTTATCTGG       |
| Apoe                | CTCCCAAGTCACACAAGAAGCTG    | CCAGCTCCTTTTTGTAAGCCTTT    |
| Col3a1              | TGACTGTCCCACGTAAGCAC       | GAGGGCCATAGCTGAACTGA       |
| Col6a3              | CCAACAGCATGGAGTCATGG       | GCATTGAAGTTGGATGGCCC       |
| Timp2               | TGCAATGCAGACGTAGTGAT       | ATAGATGTCATTCCCGGAAT       |
| Igfbp4              | TGAGAGCGAACATCCCAACAA      | TGTCCCCACGATCTTCATCTT      |
| Cxcl10              | TGCCACGTGTTGAGATCAT        | AAGGAGCCCTTTTAGACCTTTT     |
| Igfbp7              | TGCGAGCAAGGGTCTCTGAT       | GTTGGGATCCCGATGACCTC       |

**Table 2.** Primers used for RT-qPCR in this study.
